# Supplementary material
Source: PubMed Central journal article supplement (PMC6199157)
Supplement: PRO-27-1821-s001.pdf [file PRO-27-1821-s001.pdf]

## Supplementary materials

### Using $^1\text{H}^{\text{N}}$ amide temperature coefficients to define intrinsically disordered regions: An alternative NMR method

Hiroki Okazaki <sup>1</sup>, Naoki Matsuo <sup>2</sup>, Takeshi Tenno <sup>2,3</sup>, Natsuko Goda <sup>2</sup>, Yoshiaki Shigemitsu <sup>2</sup>, Motonori Ota <sup>1</sup> and Hidekazu Hiroaki <sup>2,3,4</sup> \*.

<sup>1</sup> Department of Complex Systems Science, Graduate School of Information Sciences, Nagoya University, Nagoya 464-8601, JAPAN; E-Mail:

okazaki.hiroki@h.mbox.nagoya-u.ac.jp, mota@is.nagoya-u.ac.jp

<sup>2</sup> Laboratory of Structural Molecular Pharmacology, Graduate School of Pharmaceutical Sciences, Nagoya University, Furocho, Chikusa-ku, Nagoya 464-

8601, JAPAN; E-Mail: matsuo.naoki@e.mbox.nagoya-u.ac.jp,

tenno.natsuko@f.mbox.nagoya-u.ac.jp, shigemitsu.yoshiaki@g.mbox.nagoya-u.ac.jp,

hiroaki.hidekazu@f.mbox.nagoya-u.ac.jp

<sup>3</sup> BeCellBar LLC, Business Incubation Center, Nagoya University, Aichi, Nagoya 464-8601, Aichi, JAPAN; E-Mail: tenno@becellbar.co.jp

<sup>4</sup> The Structural Biology Research Center and Division of Biological Science, Graduate School of Science, Nagoya University, Furo-cho, Nagoya, JAPAN

\* Author to whom correspondence should be addressed; E-Mail:

hiroaki.hidekazu@f.mbox.nagoya-u.ac.jp;

Tel.: +81-52-789-4535; Fax: +81-52-747-6471.

\* Corresponding author.

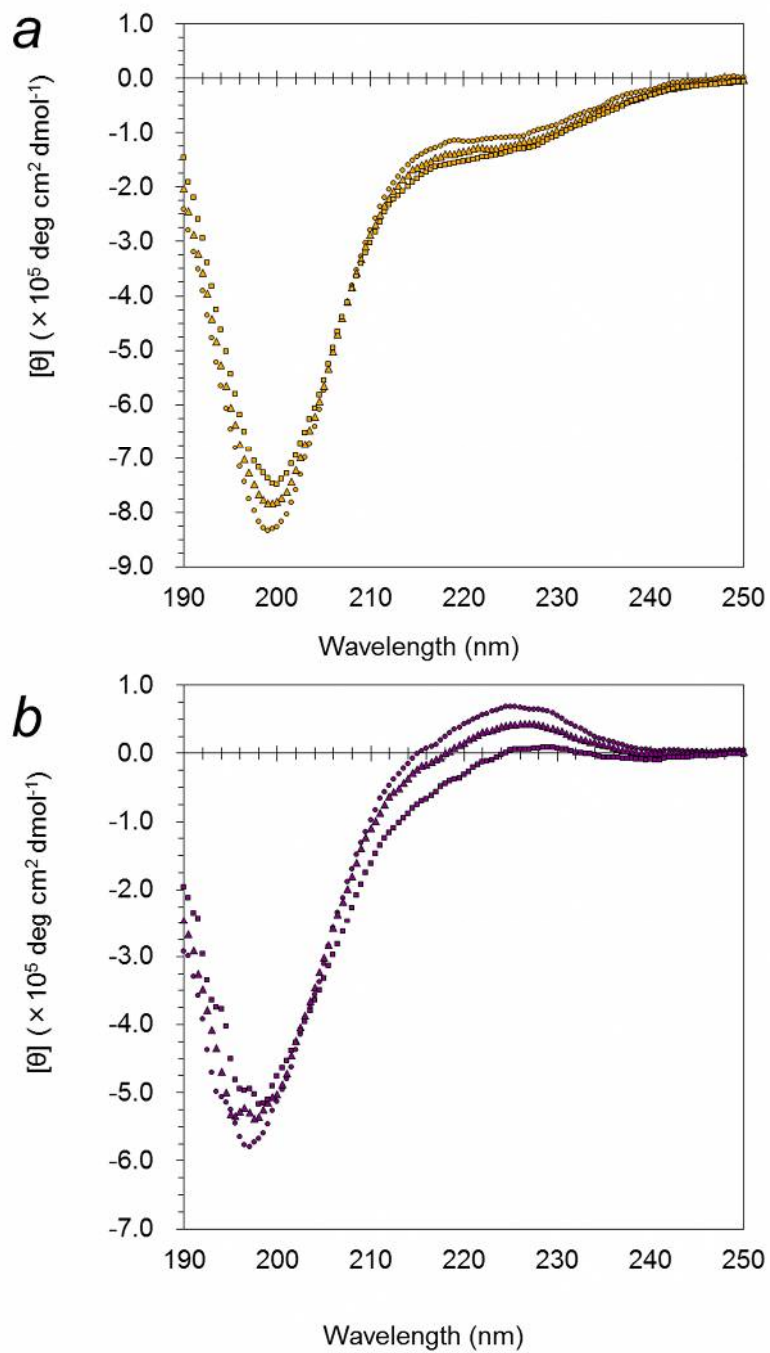

Supplementary Figure S1, CD spectra of the selected human genome-derived IDP samples. Spectra were measured at 278K (circle), 293K (triangle), and 308K (square).  
A, IDP-B3; B, IDP-C1.
